# Supplementary material
Source: PubMed Central journal article supplement (PMC4371413)
Supplement: supp_WNL.0000000000001360_Figure_e-2.pdf [file supp_WNL.0000000000001360_Figure_e-2.pdf]

## **Figure e-2 MRI outcomes in pre-specified patient subpopulations**

Reductions with DMF BID or TID vs placebo in T2 (A, B), T1-hypointense (C, D) and Gd+ (E, F) lesion number in pre-specified subpopulations based on baseline demographic and disease characteristics, over the 2 years of the study.

BID = twice daily; DMF = delayed-release dimethyl fumarate (also known as gastro-resistant DMF); EDSS; Expanded Disability Status Scale; Gd+ = gadolinium-enhancing; MS = multiple sclerosis; OR = odds ratio; TID = three times daily.

## A Number of new/enlarging T2 lesions over 2 years by subgroup: DMF\* BID vs placebo

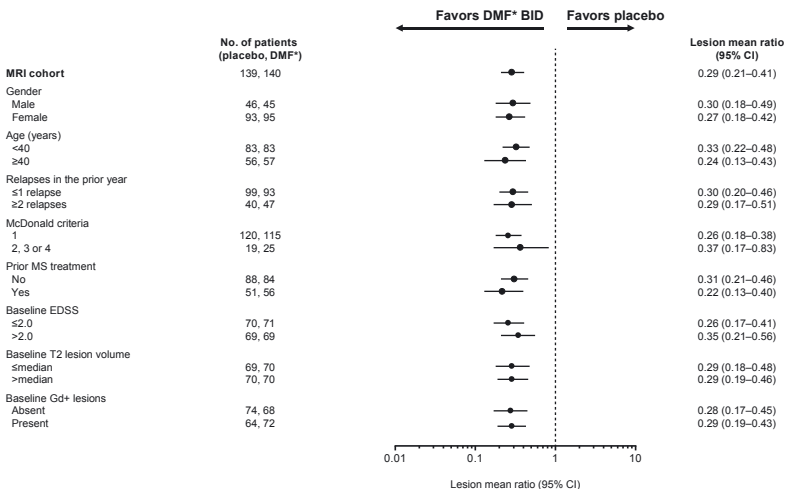

\*DMF, delayed-release DMF (also known as gastro-resistant DMF)

## B Number of new/enlarging T2 lesions over 2 years by subgroup: DMF\* TID vs placebo

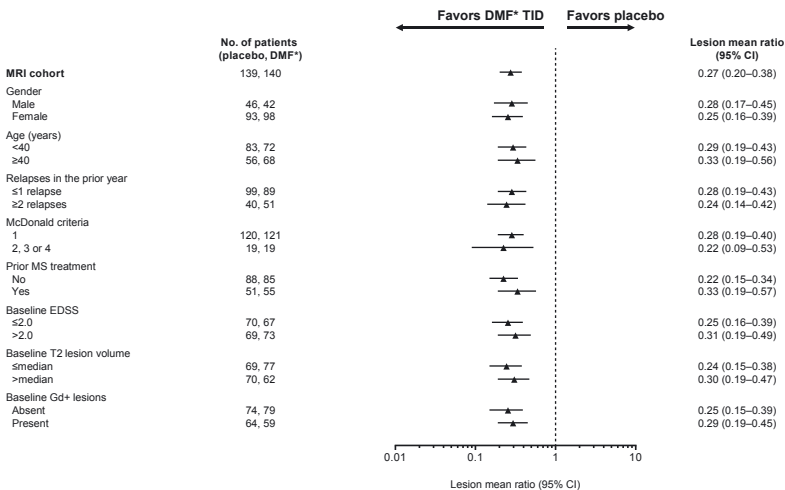

\*DMF, delayed-release DMF (also known as gastro-resistant DMF)

C

### Number of new non-enhancing T1-hypointense lesions over 2 years by subgroup: DMF\* BID vs placebo

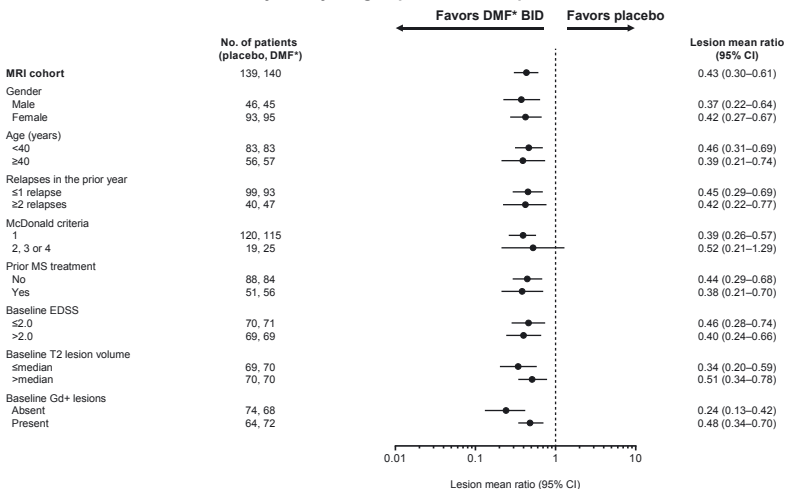

\*DMF, delayed-release DMF (also known as gastro-resistant DMF)

D

### Number of new non-enhancing T1-hypointense lesions over 2 years by subgroup: DMF\* TID vs placebo

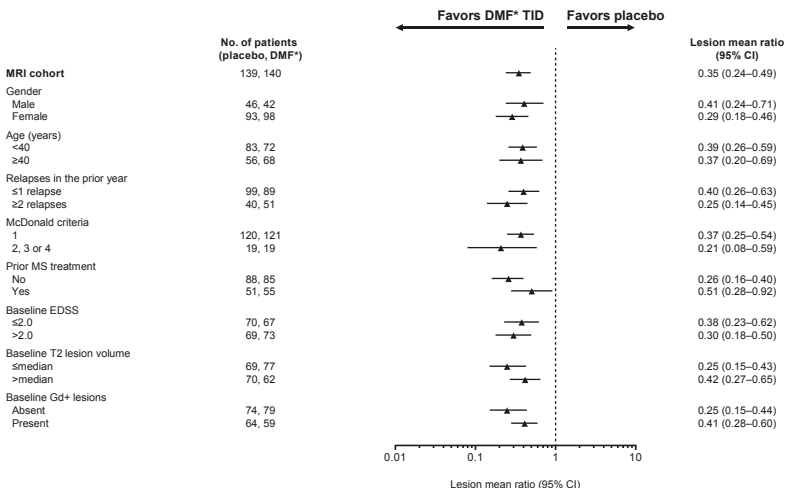

\*DMF, delayed-release DMF (also known as gastro-resistant DMF)

E

Number of Gd<sup>+</sup> lesions at 2 years by subgroup: DMF\* BID vs placebo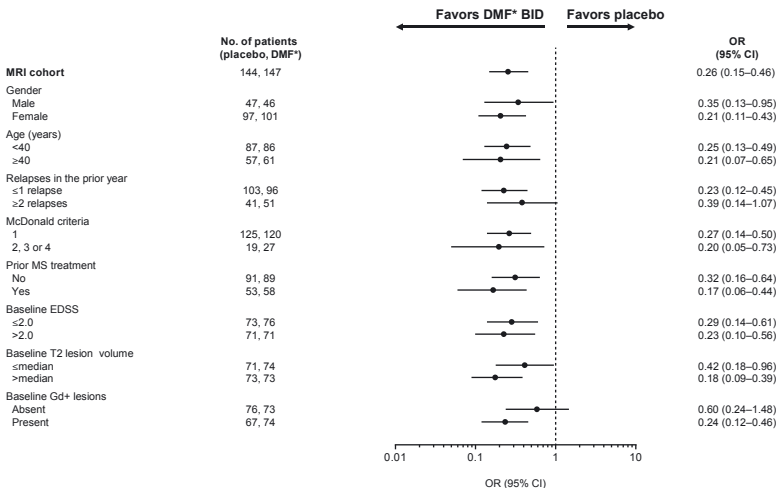

\*DMF, delayed-release DMF (also known as gastro-resistant DMF)

F

Number of Gd<sup>+</sup> lesions at 2 years by subgroup: DMF\* TID vs placebo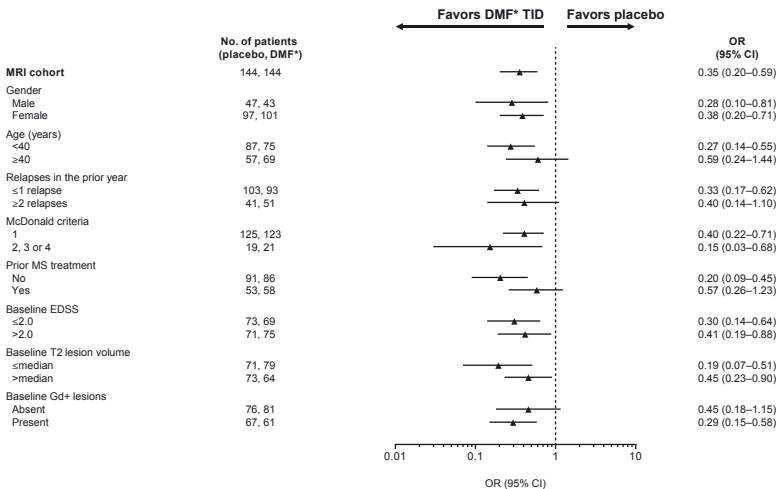

\*DMF, delayed-release DMF (also known as gastro-resistant DMF)
